# Supplementary material
Source: HighWire-hosted journal article supplement (http://gut.bmj.com/highwire/filestream/192825/field_highwire_adjunct_files/1/2009_183749_ST1.xls)
Supplement: 2009_183749_ST1.xls [file 2009_183749_ST1.xls]

## Sheet: Sheet1
Supplementary Table 1. Serum cytokine levels, Bio-Plex, Fluorescence - background
Abbreviations: F, female; C, control; AFB1, aflatoxin B1; Hh, H. hepaticus, M, male; Hep, hepatitis
		Accession	Group	Mo IL-1a (53)	Mo IL-1b (19)	Mo IL-2 (36)	Mo IL-3 (18)	Mo IL-4 (39)	Mo IL-5 (52)	Mo IL-6 (38)	Mo IL-9 (33)	Mo IL-10 (56)	Mo IL-12(p40) (76)	Mo IL-12(p70) (78)	Mo IL-13 (37)	Mo IL-17 (72)	Mo Eotaxin (74)	Mo G-CSF (54)	Mo GM-CSF (73)	Mo IFN-g (34)	Mo KC (57)	Mo MCP-1 (51)	Mo MIP-1a (77)	Mo MIP-1b (75)	Mo RANTES (55)	Mo TNF-a (21)
X1	C3,D3	06_9687	F C	329.3	74.8	285.5	532.8	26.3	134.3	218.5	185.3	94.8	1182	-46.5	196.5	523.5	20.3	717.3	-44.3	339.5	570.8	144.5	619.5	97.8	1087	226.5
X2	E3,F3	07_5068	F C	186.3	67.3	218.5	435	36.8	129.5	95.5	110	115.8	669.5	320.8	159.3	391	121.3	279.3	155.3	146.3	470.5	130.8	567.3	93.5	962.5	204
X3	G3,H3	07_5069	F C	111	54.5	184	217	22.8	84	520	63.5	72	986.8	170	190.5	111	85	556.8	-155.8	102	798	115.5	439.5	79	1082.8	140.5
X4	A4,B4	07_5070	F C	238	82.5	164.3	347.3	34	107	172.5	105.3	44.5	1563.3	271.5	168	513	116.8	3762.3	87.3	132.5	953	313.5	684	100	1201	211.3
			Mean	216.15	69.775	213.075	383.025	29.975	113.7	251.625	116.025	81.775	1100.4	178.95	178.575	384.625	85.85	1328.92	10.625	180.075	698.075	176.075	577.575	92.575	1083.33	195.575
X9	C5,D5	06_9693	F AFB1	196.5	64.3	221.5	252.3	25.5	84	-62.5	94	98.5	1001.5	239	179.8	174.5	86	603.8	21.5	126.8	743.5	125.8	558.3	87.5	836.5	153.3
X10	E5,F5	06_9694	F AFB1	276.5	67	460.5	284	19.8	106	297.5	59.5	67	731	240.5	145.3	307	112	453	70.8	64.8	469.5	117.5	510	82.8	654	156.8
X11	G5,H5	06_9695	F AFB1	217	77.5	178.5	407	37.5	106.3	189.5	103.5	116.5	351.5	220.8	186.5	149.3	142	567	154.3	143.5	699.3	164	641	82.3	1570	157.3
			Mean	230	69.6	286.833	314.433	27.6	98.7667	141.5	85.6667	94	694.667	233.433	170.533	210.267	113.333	541.267	82.2	111.7	637.433	135.767	569.767	84.2	1020.17	155.8
X15	G6,H6	06_9706	F Hh	-36.3	-21.5	33	20.5	-26.3	-18.5	-832	6.3	-42	1388.5	-348	16.5	-8	-224.3	95.3	-491.5	-6	155.5	-6	-664	-43	-8.3	4.8
X16	A7,B7	06_9707	F Hh	187.5	130	123.5	854.3	37.3	203	35.5	97.8	109	1040.8	220	153.8	513.3	109.3	631	277	141	456.8	129	705	114	1021.5	172.3
X17	C7,D7	06_9708	F Hh	145.8	54.3	156.5	418	9.5	63.5	-41	85.3	56.8	835	158	162.3	321.3	-128.5	529.8	-71.5	116.8	1520.8	154.8	480.3	63.5	480.5	145.8
X18	E7,F7	06_9709	F Hh	196.5	63.8	133.5	422	26	82.8	-10.3	75.5	110.3	887	193	138	384	72	463	24.5	108.3	619.8	132	442.3	103.5	1329.5	147
			Mean	123.375	56.65	111.625	428.7	11.625	82.7	-211.95	66.225	58.525	1037.83	55.75	117.65	302.65	-42.875	429.775	-65.375	90.025	688.225	102.45	240.9	59.5	705.8	117.475
X27	G9,H9	07_5084	F AFB1 Hh	138.5	40.8	145	214	19	78	-173.3	52.5	68.5	1067.8	70	129.3	161	5.5	582.8	45.5	72.8	907.3	89.3	173	49	1283	118.8
X28	A10,B10	07_5111	F AFB1 Hh	163.3	57	131.8	369.8	23.5	86	-54.5	76.5	99	816	105.8	134	373.8	45.5	548.3	-58.3	107.3	960.8	119.3	360.5	52.3	1238.3	136.8
X29	C10,D10	07_5112	F AFB1 Hh	167.8	50.8	160	251.3	25.5	105.8	-52.3	64	115.8	1220.5	-57.3	145	208.3	-181.5	606.3	67.5	87.5	1757.8	123	404.3	75.5	1009.8	130
X30	E10,F10	07_6265	F AFB1 Hh	158.8	107.5	185	304	23	63	-50.5	100.5	94	250	100.5	121.3	115.8	-48.3	384.8	-161.5	103.3	3902.8	95.5	330.8	64.8	814	125.5
			Mean	157.1	64.025	155.45	284.775	22.75	83.2	-82.65	73.375	94.325	838.575	54.75	132.4	214.725	-44.7	530.55	-26.7	92.725	1882.17	106.775	317.15	60.4	1086.28	127.775
X5	C4,D4	06_9691	M C	166.5	81.5	197	462	36.3	128	225	127	32.5	1530.5	276.8	172.8	517.8	99	520.5	154	153	725.3	190	637.3	136	1361.5	227.8
X6	E4,F4	06_9692	M C	186	118.8	34	557.8	54.3	59.8	107.5	140	134.5	840.8	211.5	147.5	364.5	-11.3	3923.8	-126.3	185	1666.5	323.3	720.5	164.3	1242	250
X7	G4,H4	07_5063	M C	358.8	125.5	178	920	108	187.8	293.5	135.3	206.3	1955	358	159	1407	-28.5	5845.5	-261	220.5	2255	215.8	959.5	180	1139.8	217.3
X8	A5,B5	06_5064	M C	83.5	32.8	19.5	18.8	8.8	-2	358.3	8.3	22.5	972.3	106.5	127.3	19	163	190.3	114	30	77	26.5	280.3	-2.3	-19.8	71.5
			Mean	198.7	89.65	107.125	489.65	51.85	93.4	246.075	102.65	98.95	1324.65	238.2	151.65	577.075	55.55	2620.02	-29.825	147.125	1180.95	188.9	649.4	119.5	930.875	191.65
X12	A6,B6	06_9699	M AFB1	323.3	13.3	156.5	16406	10.5	35	1205	46	41	2327	-138.5	174	65.3	39.3	3383.8	-84	677	1570.8	119.5	476.5	53.8	791	150.3
X13	C6,D6	06_9700	M AFB1	259.8	122.8	194	585.3	53.3	145.3	60.5	146.5	175.8	663	159	241	456.8	106	555.5	198	213	1542	207.3	613.8	119	1450.3	265
X14	E6,F6	07_5071	M AFB1	231.3	63.3	151.8	294	27.5	70.8	234	87	123.3	1177.3	187	165.8	264.5	110.3	418	162.5	125.8	1037.5	126	469.3	84.8	1128.8	179.3
			Mean	271.467	66.4667	167.433	5761.77	30.4333	83.7	499.833	93.1667	113.367	1389.1	69.1667	193.6	262.2	85.2	1452.43	92.1667	338.6	1383.43	150.933	519.867	85.8667	1123.37	198.2
X19	G7,H7	06_9710	M Hh No hep	151.8	56.8	182.8	442.5	21.3	55.8	-30.3	99	-15.5	900.3	70	102.8	462	-68	1719.5	-97	102.5	769	147.5	598.5	73	2952.5	117.5
X20	A8,B8	06_9711	M Hh No hep	124.3	65.8	120.5	323.5	33.5	-16.3	-103	105.3	62	1210.3	75.5	112.8	233.5	37	2261.8	-37.8	117.5	1032	148.3	458.3	81.5	1180	128.5
X22	E8,F8	06_9716	M Hh No hep	79.8	51	166.3	253.5	15.8	67.5	-44	73.5	14.3	869.5	93.8	115.8	228.5	12.8	425.5	19.5	79	1046.5	95	381.5	57	857	115.3
X24	A9,B9	07_5078	M Hh No hep	120.3	48.5	172	252.8	20	61.5	-7.8	77.5	103.5	2286.3	99.8	130.8	162.5	55.8	569.3	86.8	106	748.5	124.8	373	57	1170	114.5
			Mean	119.05	119.05	119.05	119.05	119.05	119.05	119.05	119.05	119.05	119.05	119.05	119.05	119.05	119.05	119.05	119.05	119.05	119.05	119.05	119.05	119.05	119.05	119.05
X21	C8,D8	06_9713	M Hh Hep	374.3	46.3	118.5	229	76.5	33.5	114	77	113	2809	333	43	141.5	-96	928	-355.3	111.5	2631	272.5	695.5	108	2142	158.8
X23	G8,H8	07_5077	M Hh Hep	87.3	30	154	163.8	12	42.8	-68.8	48	10	2487	43.3	133.5	103	-8	198.5	-71	72.5	1090.3	133.8	302.3	43.5	1906.5	98.3
X25	C9,D9	07_5080	M Hh Hep	78.3	14.8	57	48.5	1	14	239.8	2	25.5	4521.5	-41.8	123	34.3	62.8	404.3	-49.3	32.5	1059	135.8	424	24.5	684.5	82.8
X26	E9,F9	07_5082	M Hh Hep	128.3	52	175	365.5	24.5	70.5	388	78	75.8	2493	-37.3	117.8	176.8	-6.5	422.3	-22.3	113.8	3170.5	493.5	395.8	70	2579.5	86.8
			Mean	167.05	35.775	126.125	201.7	28.5	40.2	168.25	51.25	56.075	3077.62	74.3	104.325	113.9	-11.925	488.275	-124.475	82.575	1987.7	258.9	454.4	61.5	1828.12	106.675
X32	A11,B11	07_5115	M AFB1 Hh No hep	254.5	140	194.5	571.5	89.5	129.3	-213.8	176.3	158.5	1406	294.3	199.3	627.5	26	1728.8	76.8	254.5	1182.8	238.5	674	165.3	1409.8	245.8
X34	E11,F11	07_5117	M AFB1 Hh No hep	116.8	45.3	91.5	22	13.5	19	2433.5	46	-17.5	5486	-18.3	128.8	322.8	-36	21162.3	-233	109.5	5945.3	41.3	536.5	28.8	737.5	87
X35	G11,H11	07_5120	M AFB1 Hh No hep	239.8	62.5	127.3	311.5	34.3	61	66.5	86.5	68.3	598.5	162.8	118.3	320.5	23.3	437.3	127.3	100.8	1007.5	119.5	363.8	70.3	654.3	144.8
X37	C12,D12	07_5122	M AFB1 Hh No hep	202.5	158.8	175.5	552.8	85	146	19.3	153.5	249.8	157.8	299.3	230.5	437	83.8	607.5	218.8	259	1404.3	220.3	606.3	171.8	1334.5	266
			Mean	203.4	101.65	147.2	364.45	55.575	88.825	576.375	115.575	114.775	1912.08	184.525	169.225	426.95	24.275	5983.97	47.475	180.95	2384.97	154.9	545.15	109.05	1034.03	185.9
X31	G10,H10	07_5114	M AFB1 Hh Hep	183	44.8	115	300.5	30	52	-384.8	66	108	1426.5	-150.3	117	281	-106.8	651.8	-255.5	79.5	1229.5	151.5	402.3	44.8	1701.5	99.8
X33	C11,D11	07_5116	M AFB1 Hh Hep	239.5	56.8	122	207.5	47	76	-6	65	87	1584.5	131.5	124.3	364	-19	1127	-91	97.3	2489.3	166.5	458	87	1758.5	103.3
X36	A12,B12	07_5121	M AFB1 Hh Hep	149.8	91.8	172	425.3	46	80.8	-49	120.5	122.5	2277.5	87	145.3	296.8	-30.5	543.8	-155.5	142.5	2699.5	160.5	485.8	125.3	1743.8	184
			Mean	190.767	64.4667	136.333	311.1	41	69.6	-146.6	83.8333	105.833	1762.83	22.7333	128.867	313.933	-52.1	774.2	-167.333	106.433	2139.43	159.5	448.7	85.7	1734.6	129.033
